# Supplementary material for: Outer Membrane Protein A Conservation among <em>Orientia tsutsugamushi</em> Isolates Suggests Its Potential as a Protective Antigen and Diagnostic Target
Source: Preprints.org preprint supplement (doi:10.20944/preprints201804.0141.v1), 2018-04-11
Supplement: Supplementary file 1 [file supplementary]

## Sheet: Sheet1
Table S1. Nucleotide and amino acid identity values for O. tsutsugamushi OmpA sequences
	Ikeda	CRF09	CRF58	CRF136	CRF158	FPW1038	FPW2016	FPW2049	LNT1153	LNT1189	LNT1301	LNT1310	SV400	SV445	SV484	TM2328	TM2395	TM2494	TM2532	TM2766	TM2950	TM3115	UT76	UT125	UT169	UT177	UT219	UT336	UT340	UT418	UT559	UT652	Boryong	Gilliam	Kato	Woods	Karp	TA763	TH1817	AFC3	AFC30	AFPL12	MAK110	MAK119	MAK243	18-032460	Calcutta	Brown	Citrano
Ikeda	***	99	96.6	99.2	96.4	96.4	98.4	96.1	96.7	96.7	98.4	96.7	98	98	98.4	98.2	96.1	96.7	99	96.7	96.1	94.6	98.2	98.7	96.9	98.4	95.2	97.7	98	98.4	98.2	97.7	93.8	96.4	99.8	94.9	97.7	98.4	98	99	98.7	98.7	98.2	96.6	98.2	99.2	97.4	94.9	95.6
CRF09	99	***	96.6	99.8	96.4	96.1	98.7	96.1	96.7	96.7	99	96.7	98.4	98.4	98.7	97.9	96.1	96.7	98.4	96.7	96.1	94.6	98.5	98	97.2	98.7	94.9	98	98.4	98.7	98.5	97.1	93.8	96	99.2	94.9	98	98.7	98.4	99.7	98.4	98.4	98.5	96.6	98.5	98.9	97.1	94.6	95.2
CRF58	92.6	92.6	***	96.7	99.5	96.7	96.6	97.9	99.8	99.8	96.2	99.8	96	96.2	96.2	96.1	97.9	99.8	96.6	99.8	99.2	97.7	96.4	96	95.2	96.6	95.6	95.9	96.2	96.6	96.4	95.2	93.8	97.6	96.7	94.7	95.9	95.9	96.2	96.6	96.6	96.6	96.4	95.4	96.4	97	95.2	94.1	94.4
CRF136	99.5	99.5	93.1	***	96.6	96.2	98.9	96.2	96.9	96.9	99.2	96.9	98.6	98.5	98.9	98	96.2	96.9	98.5	96.9	96.2	94.7	98.7	98.2	97.4	98.9	95.1	98.2	98.5	98.9	98.7	97.2	93.9	96.2	99.3	95.1	98.2	98.9	98.5	99.8	98.5	98.5	98.7	96.7	98.7	99	97.2	94.7	95.4
CRF158	91.6	91.6	99	92.1	***	96.6	96.4	97.7	99.7	99.7	96.1	99.7	95.6	96.1	96.1	95.9	97.7	99.7	96.4	99.7	99	97.5	96.2	95.6	95.1	96.4	95.4	95.7	96.1	96.4	96.2	95.1	93.6	97.4	96.6	94.6	95.7	95.7	96.1	96.4	96.4	96.4	96.2	95.2	96.2	96.9	95.1	93.9	94.3
FPW1038	93.1	93.1	95.6	93.6	94.6	***	96.4	96.2	96.9	96.9	96.1	96.9	95.4	96.1	96.4	96.6	96.2	96.9	96.7	96.9	96.6	95.4	96.2	95.8	95.4	96.4	97.9	95.7	96.1	96.4	96.2	96.1	95.1	96.4	96.6	95.7	96.1	95.7	96.1	96.1	96.7	96.7	96.2	95.4	96.2	96.6	95.7	95.2	94.7
FPW2016	97.1	97.1	92.6	97.6	91.6	93.1	***	96.7	96.7	96.7	99.7	96.7	99.5	99.7	99.7	99.2	96.7	96.7	99.3	96.7	96.7	94.9	99.8	98.7	98.5	100	95.2	99.3	99.7	100	99.8	97.4	94.1	97.1	98.5	94.6	99.3	99.3	99.7	98.7	99.7	99.7	99.8	96.9	99.8	98.9	98.4	94.3	95.2
FPW2049	92.6	92.6	97	93.1	96.1	94.6	93.6	***	98	98	96.4	98	95.8	96.4	96.4	96.2	100	98	96.7	98	97.7	96.9	96.6	95.8	95.4	96.7	95.7	96.1	96.4	96.7	96.6	95.7	94.6	97.8	96.2	94.3	96.1	96.1	96.4	96.1	96.7	96.7	96.6	94.9	96.6	96.2	95.4	93.6	93.9
LNT1153	92.6	92.6	100	93.1	99	95.6	92.6	97	***	100	96.4	100	96	96.4	96.4	96.2	98	100	96.7	100	99.3	97.9	96.6	96	95.4	96.7	95.7	96.1	96.4	96.7	96.6	95.4	93.9	97.8	96.9	94.9	96.1	96.1	96.4	96.7	96.7	96.7	96.6	95.6	96.6	97.2	95.4	94.3	94.6
LNT1189	92.6	92.6	100	93.1	99	95.6	92.6	97	100	***	96.4	100	96	96.4	96.4	96.2	98	100	96.7	100	99.3	97.9	96.6	96	95.4	96.7	95.7	96.1	96.4	96.7	96.6	95.4	93.9	97.8	96.9	94.9	96.1	96.1	96.4	96.7	96.7	96.7	96.6	95.6	96.6	97.2	95.4	94.3	94.6
LNT1301	97.6	97.6	92.1	98	91.1	92.6	99.5	93.1	92.1	92.1	***	96.4	99.5	99.3	99.7	98.9	96.4	96.4	99	96.4	96.4	94.6	99.5	98.7	98.2	99.7	94.9	99	99.3	99.7	99.5	97.1	93.8	96.7	98.5	94.6	99	99.3	99.3	99	99.3	99.3	99.5	96.6	99.5	98.5	98	94.3	94.9
LNT1310	92.6	92.6	100	93.1	99	95.6	92.6	97	100	100	92.1	***	96	96.4	96.4	96.2	98	100	96.7	100	99.3	97.9	96.6	96	95.4	96.7	95.7	96.1	96.4	96.7	96.6	95.4	93.9	97.8	96.9	94.9	96.1	96.1	96.4	96.7	96.7	96.7	96.6	95.6	96.6	97.2	95.4	94.3	94.6
SV400	97.3	97.3	91.8	97.8	90.7	91.8	99.5	92.3	91.8	91.8	100	91.8	***	99.8	99.5	98.6	95.8	96	98.7	96	96	94.1	99.3	98.9	98.2	99.5	94.5	99.5	99.5	99.5	99.3	97.3	93.8	96.3	98.2	94.9	99.1	99.8	99.8	98.4	99.1	99.1	99.3	96.9	99.6	98.2	98.4	94.1	94.9
SV445	97.1	97.1	92.6	97.6	91.6	93.1	100	93.6	92.6	92.6	99.5	92.6	99.5	***	99.3	98.9	96.4	96.4	99	96.4	96.4	94.7	99.5	98.7	98.5	99.7	95.2	99.7	99.7	99.7	99.5	97.7	94.3	96.7	98.2	94.9	99.3	99.7	100	98.4	99.3	99.3	99.5	97.2	99.8	98.5	98.7	94.3	95.2
SV484	97.1	97.1	91.6	97.6	90.6	93.1	99	92.6	91.6	91.6	99.5	91.6	99.5	99	***	98.9	96.4	96.4	99	96.4	96.4	94.6	99.5	98.7	98.2	99.7	94.9	99	99.3	99.7	99.5	97.4	94.1	96.7	98.5	94.6	99	99.3	99.3	98.7	99.3	99.3	99.5	96.6	99.5	98.5	98	94.3	94.9
TM2328	96.6	96.6	92.1	97.1	91.1	92.6	99.5	93.1	92.1	92.1	99	92.1	98.9	99.5	98.5	***	96.2	96.2	99.2	96.2	96.2	94.7	99	98.6	98.4	99.2	95.7	98.5	98.9	99.2	99	97.2	93.6	96.9	98.4	94.4	98.5	98.5	98.9	97.9	99.5	99.5	99	96.1	99	98.4	98.2	94.1	95.1
TM2395	92.6	92.6	97	93.1	96.1	94.6	93.6	100	97	97	93.1	97	92.3	93.6	92.6	93.1	***	98	96.7	98	97.7	96.9	96.6	95.8	95.4	96.7	95.7	96.1	96.4	96.7	96.6	95.7	94.6	97.8	96.2	94.3	96.1	96.1	96.4	96.1	96.7	96.7	96.6	94.9	96.6	96.2	95.4	93.6	93.9
TM2494	92.6	92.6	100	93.1	99	95.6	92.6	97	100	100	92.1	100	91.8	92.6	91.6	92.1	97	***	96.7	100	99.3	97.9	96.6	96	95.4	96.7	95.7	96.1	96.4	96.7	96.6	95.4	93.9	97.8	96.9	94.9	96.1	96.1	96.4	96.7	96.7	96.7	96.6	95.6	96.6	97.2	95.4	94.3	94.6
TM2532	97.6	97.6	93.1	98	92.1	93.6	99.5	94.1	93.1	93.1	99	93.1	98.9	99.5	98.5	99	94.1	93.1	***	96.7	96.7	94.9	99.2	99.5	97.9	99.3	95.6	98.7	99	99.3	99.2	98	94.1	97.4	99.2	94.6	98.7	98.7	99	98.4	99.7	99.7	99.2	96.9	99.2	99.2	98.4	94.6	95.6
TM2766	92.6	92.6	100	93.1	99	95.6	92.6	97	100	100	92.1	100	91.8	92.6	91.6	92.1	97	100	93.1	***	99.3	97.9	96.6	96	95.4	96.7	95.7	96.1	96.4	96.7	96.6	95.4	93.9	97.8	96.9	94.9	96.1	96.1	96.4	96.7	96.7	96.7	96.6	95.6	96.6	97.2	95.4	94.3	94.6
TM2950	91.6	91.6	99	92.1	98	94.6	93.1	96.6	99	99	92.6	99	92.3	93.1	92.1	92.6	96.6	99	93.6	99	***	98.2	96.6	96	95.4	96.7	95.4	96.1	96.4	96.7	96.6	95.1	93.8	97.8	96.2	94.6	96.1	96.1	96.4	96.1	96.7	96.7	96.6	94.9	96.6	96.6	95.4	93.9	94.3
TM3115	91.6	91.6	99	92.1	98	94.6	92.1	97.5	99	99	91.6	99	91.2	92.1	91.1	91.6	97.5	99	92.6	99	99	***	94.7	94.1	94.9	94.9	95.6	94.7	94.7	94.9	94.7	95.4	94.4	96.4	94.7	94.9	94.7	94.4	94.7	94.6	94.9	94.9	94.7	94.6	94.9	95.1	94.6	95.1	95.4
UT76	96.6	96.6	92.1	97.1	91.1	92.6	99.5	93.1	92.1	92.1	99	92.1	98.9	99.5	98.5	99	93.1	92.1	99	92.1	92.6	91.6	***	98.6	98.4	99.8	95.1	99.2	99.5	99.8	99.7	97.2	93.9	96.9	98.4	94.4	99.2	99.2	99.5	98.5	99.5	99.5	99.7	96.7	99.7	98.7	98.2	94.1	95.1
UT125	97.8	97.8	92.3	98.4	91.2	92.3	98.9	92.9	92.3	92.3	99.5	92.3	99.5	98.9	98.9	98.4	92.9	92.3	99.5	92.3	92.9	91.8	98.4	***	97.1	98.7	94.5	98.4	99.1	98.7	98.6	97.6	93.4	96.7	98.9	94.5	98.7	98.7	98.7	98	99.1	99.1	98.6	96.5	98.9	98.6	98	94.1	94.9
UT169	96.6	96.6	92.1	97.1	91.1	92.6	99.5	93.1	92.1	92.1	99	92.1	98.9	99.5	98.5	99	93.1	92.1	99	92.1	92.6	91.6	99	98.4	***	98.5	95.9	98.5	98.2	98.5	98.4	96.9	93.8	95.7	97.1	94.6	97.9	98.2	98.5	97.2	98.2	98.2	98.4	96.6	98.4	97.4	97.9	94.6	95.6
UT177	97.1	97.1	92.6	97.6	91.6	93.1	100	93.6	92.6	92.6	99.5	92.6	99.5	100	99	99.5	93.6	92.6	99.5	92.6	93.1	92.1	99.5	98.9	99.5	***	95.2	99.3	99.7	100	99.8	97.4	94.1	97.1	98.5	94.6	99.3	99.3	99.7	98.7	99.7	99.7	99.8	96.9	99.8	98.9	98.4	94.3	95.2
UT219	93.6	93.6	96.1	94.1	95.1	97.5	93.6	96.1	96.1	96.1	93.1	96.1	92.3	93.6	92.6	93.1	96.1	96.1	94.1	96.1	95.1	96.1	93.1	92.9	93.1	93.6	***	94.9	94.9	95.2	95.1	95.9	95.2	95.2	95.4	95.9	94.9	94.9	95.2	94.9	95.6	95.6	95.1	95.2	95.1	95.4	95.6	95.4	94.9
UT336	96.6	96.6	92.1	97.1	91.1	92.6	99.5	93.1	92.1	92.1	99	92.1	98.9	99.5	98.5	99	93.1	92.1	99	92.1	92.6	91.6	99	98.4	99	99.5	93.1	***	99.3	99.3	99.2	97.4	93.9	96.4	97.9	94.6	99	99.3	99.7	98	99	99	99.2	96.9	99.5	98.2	98.4	94.3	95.2
UT340	97.1	97.1	92.6	97.6	91.6	93.1	100	93.6	92.6	92.6	99.5	92.6	99.5	100	99	99.5	93.6	92.6	99.5	92.6	93.1	92.1	99.5	98.9	99.5	100	93.6	99.5	***	99.7	99.5	97.4	93.9	96.7	98.2	94.6	99.7	99.3	99.7	98.4	99.3	99.3	99.5	96.9	99.8	98.5	98.4	93.9	94.9
UT418	97.1	97.1	92.6	97.6	91.6	93.1	100	93.6	92.6	92.6	99.5	92.6	99.5	100	99	99.5	93.6	92.6	99.5	92.6	93.1	92.1	99.5	98.9	99.5	100	93.6	99.5	100	***	99.8	97.4	94.1	97.1	98.5	94.6	99.3	99.3	99.7	98.7	99.7	99.7	99.8	96.9	99.8	98.9	98.4	94.3	95.2
UT559	96.6	96.6	92.1	97.1	91.1	92.6	99.5	93.1	92.1	92.1	99	92.1	98.9	99.5	98.5	99	93.1	92.1	99	92.1	92.6	91.6	99	98.4	99	99.5	93.1	99	99.5	99.5	***	97.2	93.9	96.9	98.4	94.4	99.2	99.2	99.5	98.5	99.5	99.5	99.7	96.7	99.7	98.7	98.2	94.1	95.1
UT652	97.1	97.1	92.6	97.6	91.6	94.1	97.1	93.6	92.6	92.6	96.6	92.6	96.2	97.1	97.1	96.6	93.6	92.6	97.6	92.6	91.6	92.6	96.6	96.7	96.6	97.1	94.6	96.6	97.1	97.1	97.1	***	95.2	95.7	97.9	95.6	97.4	97.4	97.7	97.1	97.7	97.7	97.2	96.9	97.6	97.9	97.7	95.2	96.2
Boryong	92.1	92.1	93.6	92.6	92.6	95.1	92.6	94.1	93.6	93.6	92.1	93.6	91.2	92.6	92.6	92.1	94.1	93.6	93.1	93.6	93.1	94.1	92.1	91.8	92.1	92.6	95.6	92.1	92.6	92.6	92.1	94.1	***	93.8	93.9	94.7	94.1	93.9	94.3	93.8	94.1	94.1	93.9	94.6	94.1	93.9	94.3	94.1	94.1
Gilliam	92.8	92.8	95.9	93.3	94.8	93.3	94.8	96.9	95.9	95.9	94.3	95.9	94.2	94.8	93.8	94.3	96.9	95.9	95.4	95.9	96.4	95.4	94.3	94.8	94.8	94.8	93.8	94.3	94.8	94.8	94.3	92.8	92.3	***	96.6	94.7	96.7	96.4	96.7	96	97.4	97.4	96.9	95.5	96.9	96.6	96.7	94.7	94.8
Kato	99.5	99.5	93.1	100	92.1	93.6	97.6	93.1	93.1	93.1	98	93.1	97.8	97.6	97.6	97.1	93.1	93.1	98	93.1	92.1	92.1	97.1	98.4	97.1	97.6	94.1	97.1	97.6	97.6	97.1	97.6	92.6	93.3	***	95.1	97.9	98.5	98.2	99.2	98.9	98.9	98.4	96.7	98.4	99.3	97.6	95.1	95.7
Woods	91.6	91.6	92.1	92.1	91.1	93.6	91.1	92.6	92.1	92.1	91.6	92.1	91.2	91.1	91.1	90.6	92.6	92.1	91.6	92.1	92.1	93.1	90.6	91.8	90.6	91.1	95.1	90.6	91.1	91.1	90.6	91.6	92.6	92.3	92.1	***	94.6	94.9	94.9	94.9	94.6	94.6	94.4	95.9	94.7	95.1	94.6	98	96.9
Karp	96.6	96.6	92.1	97.1	91.1	92.6	99.5	93.1	92.1	92.1	99	92.1	98.9	99.5	98.5	99	93.1	92.1	99	92.1	92.6	91.6	99	98.4	99	99.5	93.1	99	99.5	99.5	99	96.6	92.6	94.3	97.1	90.6	***	99	99.3	98	99	99	99.2	96.9	99.5	98.2	98.4	93.9	94.9
TA763	98	98	91.6	98.5	90.6	92.1	99	92.6	91.6	91.6	99.5	91.6	99.5	99	99	98.5	92.6	91.6	98.5	91.6	92.1	91.1	98.5	98.9	98.5	99	92.6	98.5	99	99	98.5	96.1	91.6	93.8	98.5	91.1	98.5	***	99.7	98.7	99	99	99.2	96.9	99.5	98.2	98.4	94.3	94.9
TH1817	97.1	97.1	92.6	97.6	91.6	93.1	100	93.6	92.6	92.6	99.5	92.6	99.5	100	99	99.5	93.6	92.6	99.5	92.6	93.1	92.1	99.5	98.9	99.5	100	93.6	99.5	100	100	99.5	97.1	92.6	94.8	97.6	91.1	99.5	99	***	98.4	99.3	99.3	99.5	97.2	99.8	98.5	98.7	94.3	95.2
AFC3	99	99	92.6	99.5	91.6	93.1	97.1	92.6	92.6	92.6	97.6	92.6	97.3	97.1	97.1	96.6	92.6	92.6	97.6	92.6	91.6	91.6	96.6	97.8	96.6	97.1	93.6	96.6	97.1	97.1	96.6	97.1	92.1	92.8	99.5	91.6	96.6	98	97.1	***	98.4	98.4	98.5	96.6	98.5	98.9	97.1	94.6	95.2
AFC30	97.1	97.1	92.6	97.6	91.6	93.1	100	93.6	92.6	92.6	99.5	92.6	99.5	100	99	99.5	93.6	92.6	99.5	92.6	93.1	92.1	99.5	98.9	99.5	100	93.6	99.5	100	100	99.5	97.1	92.6	94.8	97.6	91.1	99.5	99	100	97.1	***	100	99.5	96.6	99.5	98.9	98.7	94.3	95.2
AFPL12	97.1	97.1	92.6	97.6	91.6	93.1	100	93.6	92.6	92.6	99.5	92.6	99.5	100	99	99.5	93.6	92.6	99.5	92.6	93.1	92.1	99.5	98.9	99.5	100	93.6	99.5	100	100	99.5	97.1	92.6	94.8	97.6	91.1	99.5	99	100	97.1	100	***	99.5	96.6	99.5	98.9	98.7	94.3	95.2
MAK110	96.6	96.6	92.1	97.1	91.1	92.6	99.5	93.6	92.1	92.1	99	92.1	98.9	99.5	98.5	99	93.6	92.1	99	92.1	92.6	92.1	99	98.4	99	99.5	93.6	99	99.5	99.5	99	97.1	92.6	94.3	97.1	91.1	99	98.5	99.5	96.6	99.5	99.5	***	96.7	99.7	98.7	98.2	94.1	95.1
MAK119	95.6	95.6	93.1	96.1	92.1	93.1	96.6	93.1	93.1	93.1	96.1	93.1	96.2	96.6	95.6	96.1	93.1	93.1	97	93.1	92.6	92.6	96.1	96.7	96.1	96.6	93.6	96.1	96.6	96.6	96.1	95.6	93.1	94.3	96.1	92.1	96.1	95.6	96.6	95.6	96.6	96.6	96.1	***	97	97	96.6	95.6	96.7
MAK243	97.1	97.1	92.6	97.6	91.6	93.1	100	93.6	92.6	92.6	99.5	92.6	99.5	100	99	99.5	93.6	92.6	99.5	92.6	93.1	92.1	99.5	98.9	99.5	100	93.6	99.5	100	100	99.5	97.1	92.6	94.8	97.6	91.1	99.5	99	100	97.1	100	100	99.5	96.6	***	98.7	98.5	94.1	95.1
18-032460	98	98	93.6	98.5	92.6	94.1	98	93.6	93.6	93.6	97.6	93.6	97.3	98	97.1	97.6	93.6	93.6	98.5	93.6	92.6	92.6	97.6	97.8	97.6	98	94.6	97.6	98	98	97.6	98	93.1	93.8	98.5	91.6	97.6	97.1	98	98	98	98	97.6	96.6	98	***	97.6	95.1	96.1
Calcutta	97.1	97.1	92.6	97.6	91.6	93.1	100	93.6	92.6	92.6	99.5	92.6	99.5	100	99	99.5	93.6	92.6	99.5	92.6	93.1	92.1	99.5	98.9	99.5	100	93.6	99.5	100	100	99.5	97.1	92.6	94.8	97.6	91.1	99.5	99	100	97.1	100	100	99.5	96.6	100	98	***	94.1	95.1
Brown	92.6	92.6	91.6	93.1	90.6	93.1	92.1	92.1	91.6	91.6	92.6	91.6	92.3	92.1	92.1	91.6	92.1	91.6	92.6	91.6	91.6	92.6	91.6	92.9	91.6	92.1	94.6	91.6	92.1	92.1	91.6	92.6	92.6	93.3	93.1	97	91.6	92.1	92.1	92.6	92.1	92.1	92.1	93.1	92.1	92.6	92.1	***	98.2
Citrano	94.6	94.6	92.1	95.1	91.1	93.1	95.1	92.6	92.1	92.1	94.6	92.1	94.5	95.1	94.1	94.6	92.6	92.1	95.6	92.1	92.1	93.1	94.6	95.1	94.6	95.1	94.6	94.6	95.1	95.1	94.6	95.6	93.6	93.3	95.1	94.6	94.6	94.1	95.1	94.6	95.1	95.1	95.1	96.1	95.1	95.6	95.1	95.6	***
TH1812	96.6	96.6	92.6	97.1	91.6	93.1	99.5	93.6	92.6	92.6	99	92.6	98.9	99.5	98.5	99	93.6	92.6	99	92.6	93.1	92.1	99	98.4	99	99.5	93.6	99	99.5	99.5	99	96.6	92.6	94.8	97.1	91.1	99	98.5	99.5	96.6	99.5	99.5	99	96.6	99.5	97.6	99.5	92.1	95.1
Volner	97.1	97.1	92.6	97.6	91.6	93.1	100	93.6	92.6	92.6	99.5	92.6	99.5	100	99	99.5	93.6	92.6	99.5	92.6	93.1	92.1	99.5	98.9	99.5	100	93.6	99.5	100	100	99.5	97.1	92.6	94.8	97.6	91.1	99.5	99	100	97.1	100	100	99.5	96.6	100	98	100	92.1	95.1
	Ikeda	CRF09	CRF58	CRF136	CRF158	FPW1038	FPW2016	FPW2049	LNT1153	LNT1189	LNT1301	LNT1310	SV400	SV445	SV484	TM2328	TM2395	TM2494	TM2532	TM2766	TM2950	TM3115	UT76	UT125	UT169	UT177	UT219	UT336	UT340	UT418	UT559	UT652	Boryong	Gilliam	Kato	Woods	Karp	TA763	TH1817	AFC3	AFC30	AFPL12	MAK110	MAK119	MAK243	18-032460	Calcutta	Brown	Citrano
Nucleotide and amino acid identity values are presented in the top and bottom halves of the table, respectively.
[truncated: 3 more columns]
